# Supplementary material
Source: MDPI journal article supplement (https://www.mdpi.com/2073-4352/11/2/211)
Supplement: s1 [file s1]

# Computational Study of Structural, Molecular Orbitals, Optical and Thermodynamic Parameters of Thiophene Sulfonamide Derivatives

Adeel Mubarik <sup>1</sup>, Nasir Rasool <sup>1,\*</sup>, Muhammad Ali Hashmi <sup>2</sup>, Asim Mansha <sup>1</sup>,  
Muhammad Zubair <sup>1</sup>, Mohammed Rafi Shaik <sup>3,\*</sup>, Mohammed A.F. Sharaf <sup>4</sup>,  
Emad Mahrous Awwad <sup>5</sup> and Abdelatty Abdelgawad <sup>4</sup>

<sup>1</sup> Department of Chemistry, Government College University Faisalabad 38000, Pakistan; adeelmubarik2@gmail.com (A.Mu.); mansha.asim@gmail.com (A.Ma.); zubairmkn@gcuf.edu.pk (M.Z.)

<sup>2</sup> Department of Chemistry, University of Education, Attock Campus, Attock 43600, Pakistan; i4hashmi@hotmail.com (M.A.H.)

<sup>3</sup> Department of Chemistry, College of Science, King Saud University, P.O. Box 2455, Riyadh 11451, Saudi Arabia

<sup>4</sup> Department of Industrial Engineering, College of Engineering, King Saud University, P.O. Box 800, Riyadh 11421, Saudi Arabia; mfsharaf@ksu.edu.sa (M.A.F.S.); aesayed@ksu.edu.sa (A.A.)

<sup>5</sup> Department of Electrical Engineering, College of Engineering, King Saud University, P.O. Box 800, Riyadh 11421, Saudi Arabia; 436107822@student.ksu.edu.sa (E.M.A.)

\* Correspondence: nasirrasool@gcuf.edu.pk (N.R.); mrshaik@ksu.edu.sa (M.R.S.); Tel.: +966-11-4670439 (M.R.S.)

## Supplementary Materials

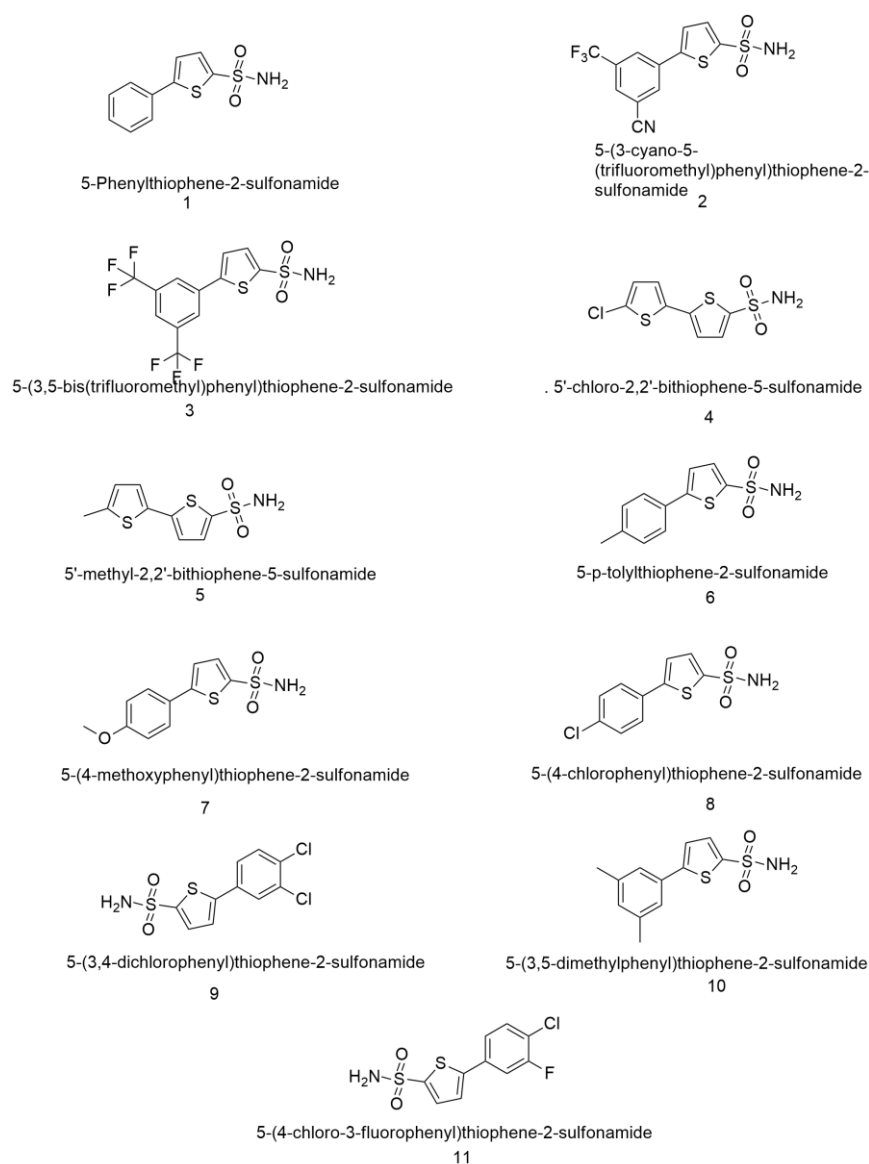

**Figure S1.** Structures and names of all compounds under study.

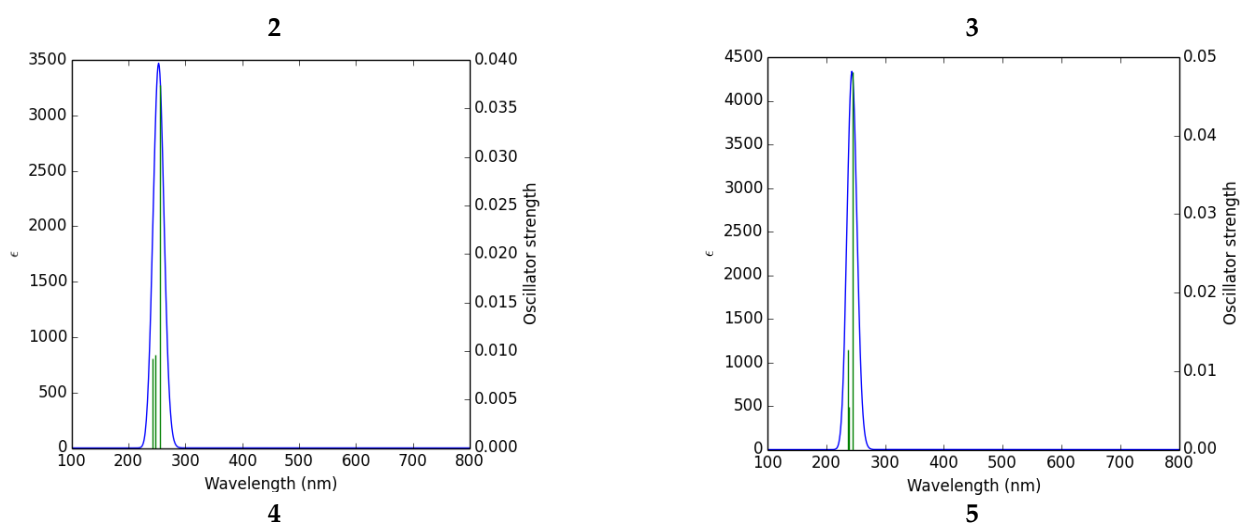

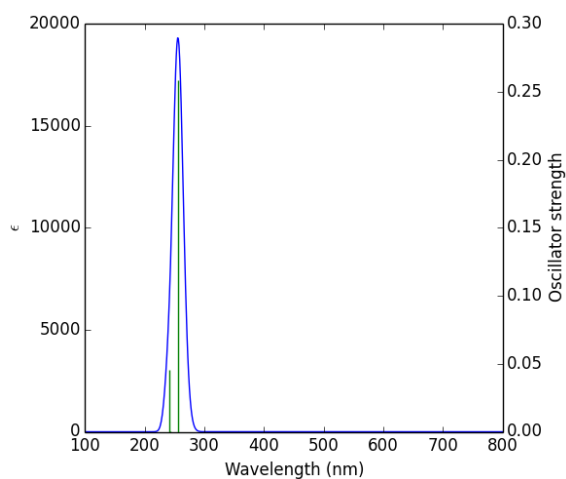**6**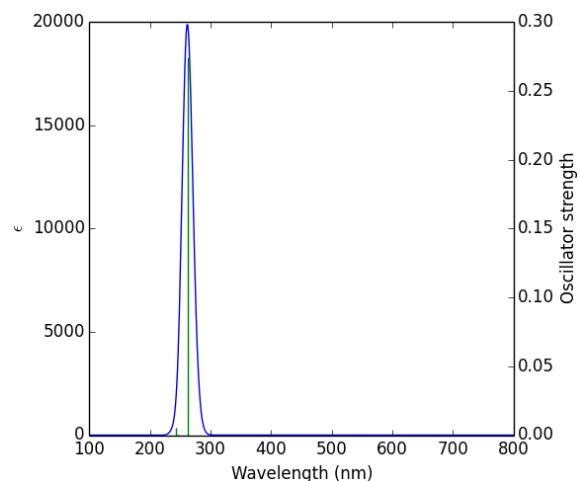**7**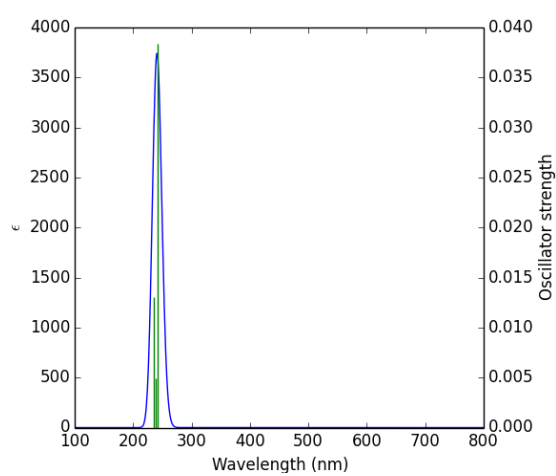**8**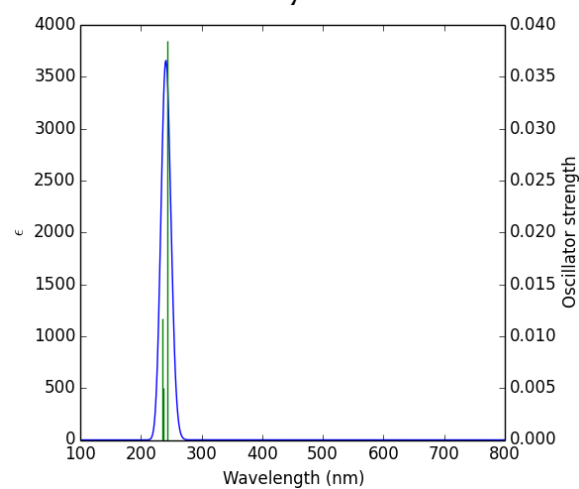**9**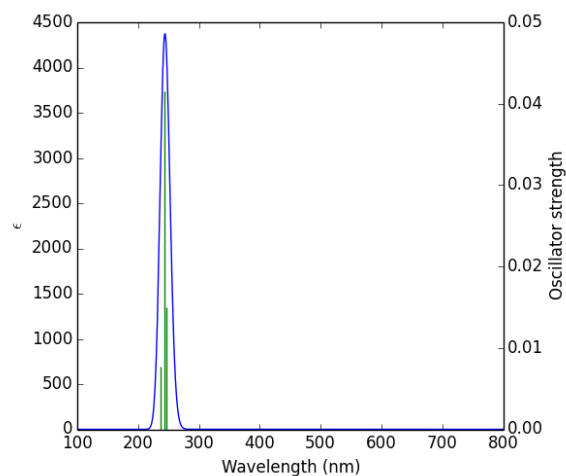**10**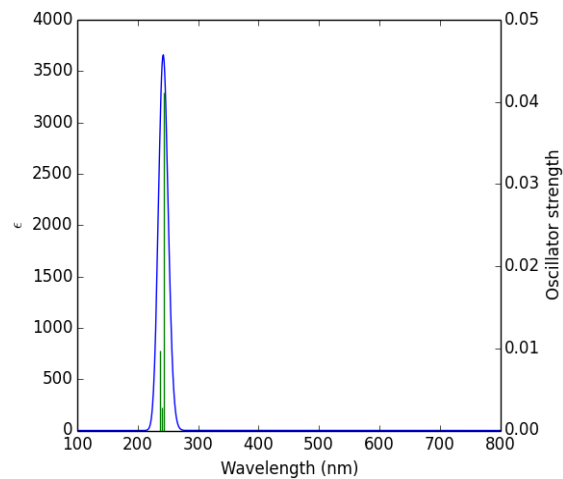**11**

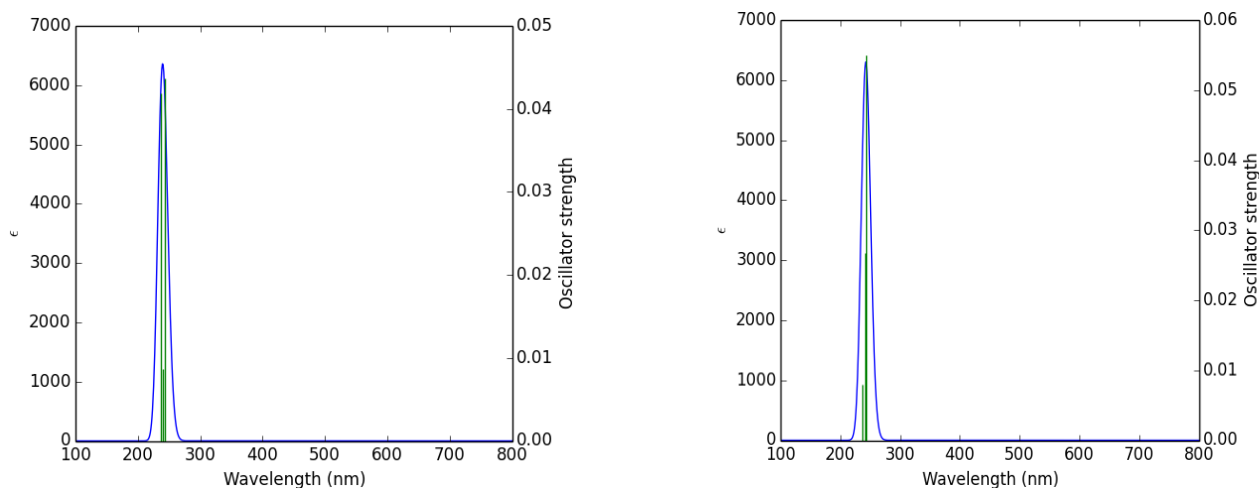

Figure S2. Theoretical calculated UV-Vis spectra of 2–11.

**Supplementary Materials:** The following are available online at [www.mdpi.com/xxx/s1](http://www.mdpi.com/xxx/s1), Figures S1 and S2.

**Author Contributions:** Conceptualization, A.Mu., and N.R.; methodology, N.R., and M.A.H., software, A.Mu., N.R., M.A.H., A.Ma., and M.Z.; formal analysis, M.R.S., M.A.F.S., and E.M.A. investigation, A.Mu., N.R., M.A.H., A.Ma., and M.Z.; resources, N.R.; data curation, A.Mu., and N.R.; writing—original draft preparation, A.Mu., N.R., M.A.H., A.Ma., and M.Z.; writing—review and editing, A.Mu., N.R., M.A.H., A.Ma., M.Z., M.R.S., and A.A.; visualization, N.R.; supervision, N.R.; project administration, N.R.; funding acquisition, M.R.S.; All authors have read and agreed to the published version of the manuscript.

**Funding:** The authors extend their appreciation to the Deanship of Scientific Research at King Saud University for funding this work through Research Group no. RG-1441-453.

**Data Availability Statement:** Data is contained within the article or supplementary material.

**Acknowledgments:** The authors extend their appreciation to the Deanship of Scientific Research at King Saud University for funding this work through Research Group no. RG-1441-453.

**Conflicts of Interest:** The authors declare no conflict of interest.

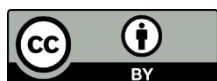

© 2021 by the authors. Licensee MDPI, Basel, Switzerland. This article is an open access article distributed under the terms and conditions of the Creative Commons Attribution (CC BY) license (<http://creativecommons.org/licenses/by/4.0/>).
